# Supplementary material
Source: Springer Nature journal article supplement (https://www.springermedizin.de/resource/supplementary/13098_2014_383_MOESM1_ESM.pdf/9670892)

|                              |                   | <u>Component of HOMA-IR</u>                 |        |                          |        |
|------------------------------|-------------------|---------------------------------------------|--------|--------------------------|--------|
| Variable                     | Component loading | t-statistic                                 | $R^2$  | Statistical significance |        |
|                              |                   |                                             |        |                          |        |
| matrix X                     | BMI               | 0.420                                       | 18.64  | 0.615                    | p<0.01 |
|                              | Leptin            | 0.364                                       | 17.59  | 0.541                    | p<0.01 |
|                              | ft3/ft4           | 0.330                                       | 9.12   | 0.476                    | p<0.01 |
|                              | SHBG              | -0.323                                      | -13.69 | -0.487                   | p<0.01 |
|                              | TG                | 0.321                                       | 6.97   | 0.468                    | p<0.01 |
|                              | Age               | -0.310                                      | -9.18  | -0.447                   | p<0.01 |
|                              | PAI-1             | 0.297                                       | 10.63  | 0.441                    | p<0.01 |
|                              | Ghrelin           | -0.284                                      | -8.91  | -0.409                   | p<0.01 |
|                              | Adiponectin       | -0.256                                      | -16.83 | -0.379                   | p<0.01 |
|                              | GMT               | 0.223                                       | 6.32   | 0.340                    | p<0.01 |
| vector Y                     | HOMA-IR           | 1.000                                       | 16.52  | 0.538                    | p<0.01 |
| <b>Explained variability</b> |                   | <b>28.9% (27.9% after cross-validation)</b> |        |                          |        |

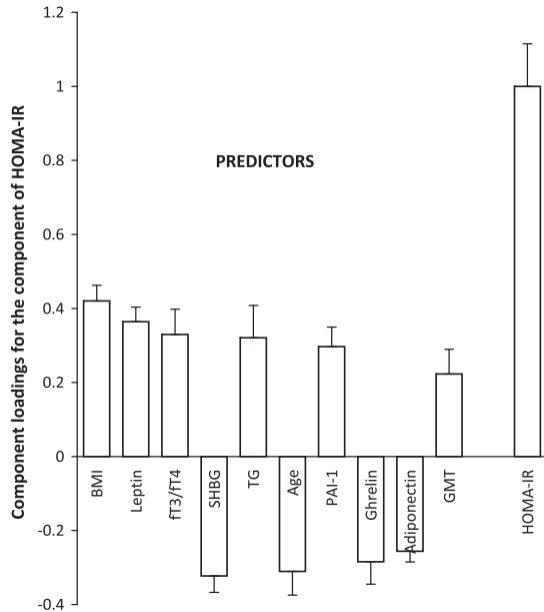

Supplement: MOESM1 [file 9670892]
